# Supplementary material for: Complete Genome Sequence of Mycoplasma suis and Insights into Its Biology and Adaption to an Erythrocyte Niche
Source: PubMed Central journal article supplement (PMC3091866; doi:10.1371/journal.pone.0019574), 2011-05-10
Supplement: pone.0019574.s001.pdf [file pone.0019574.s001.pdf]

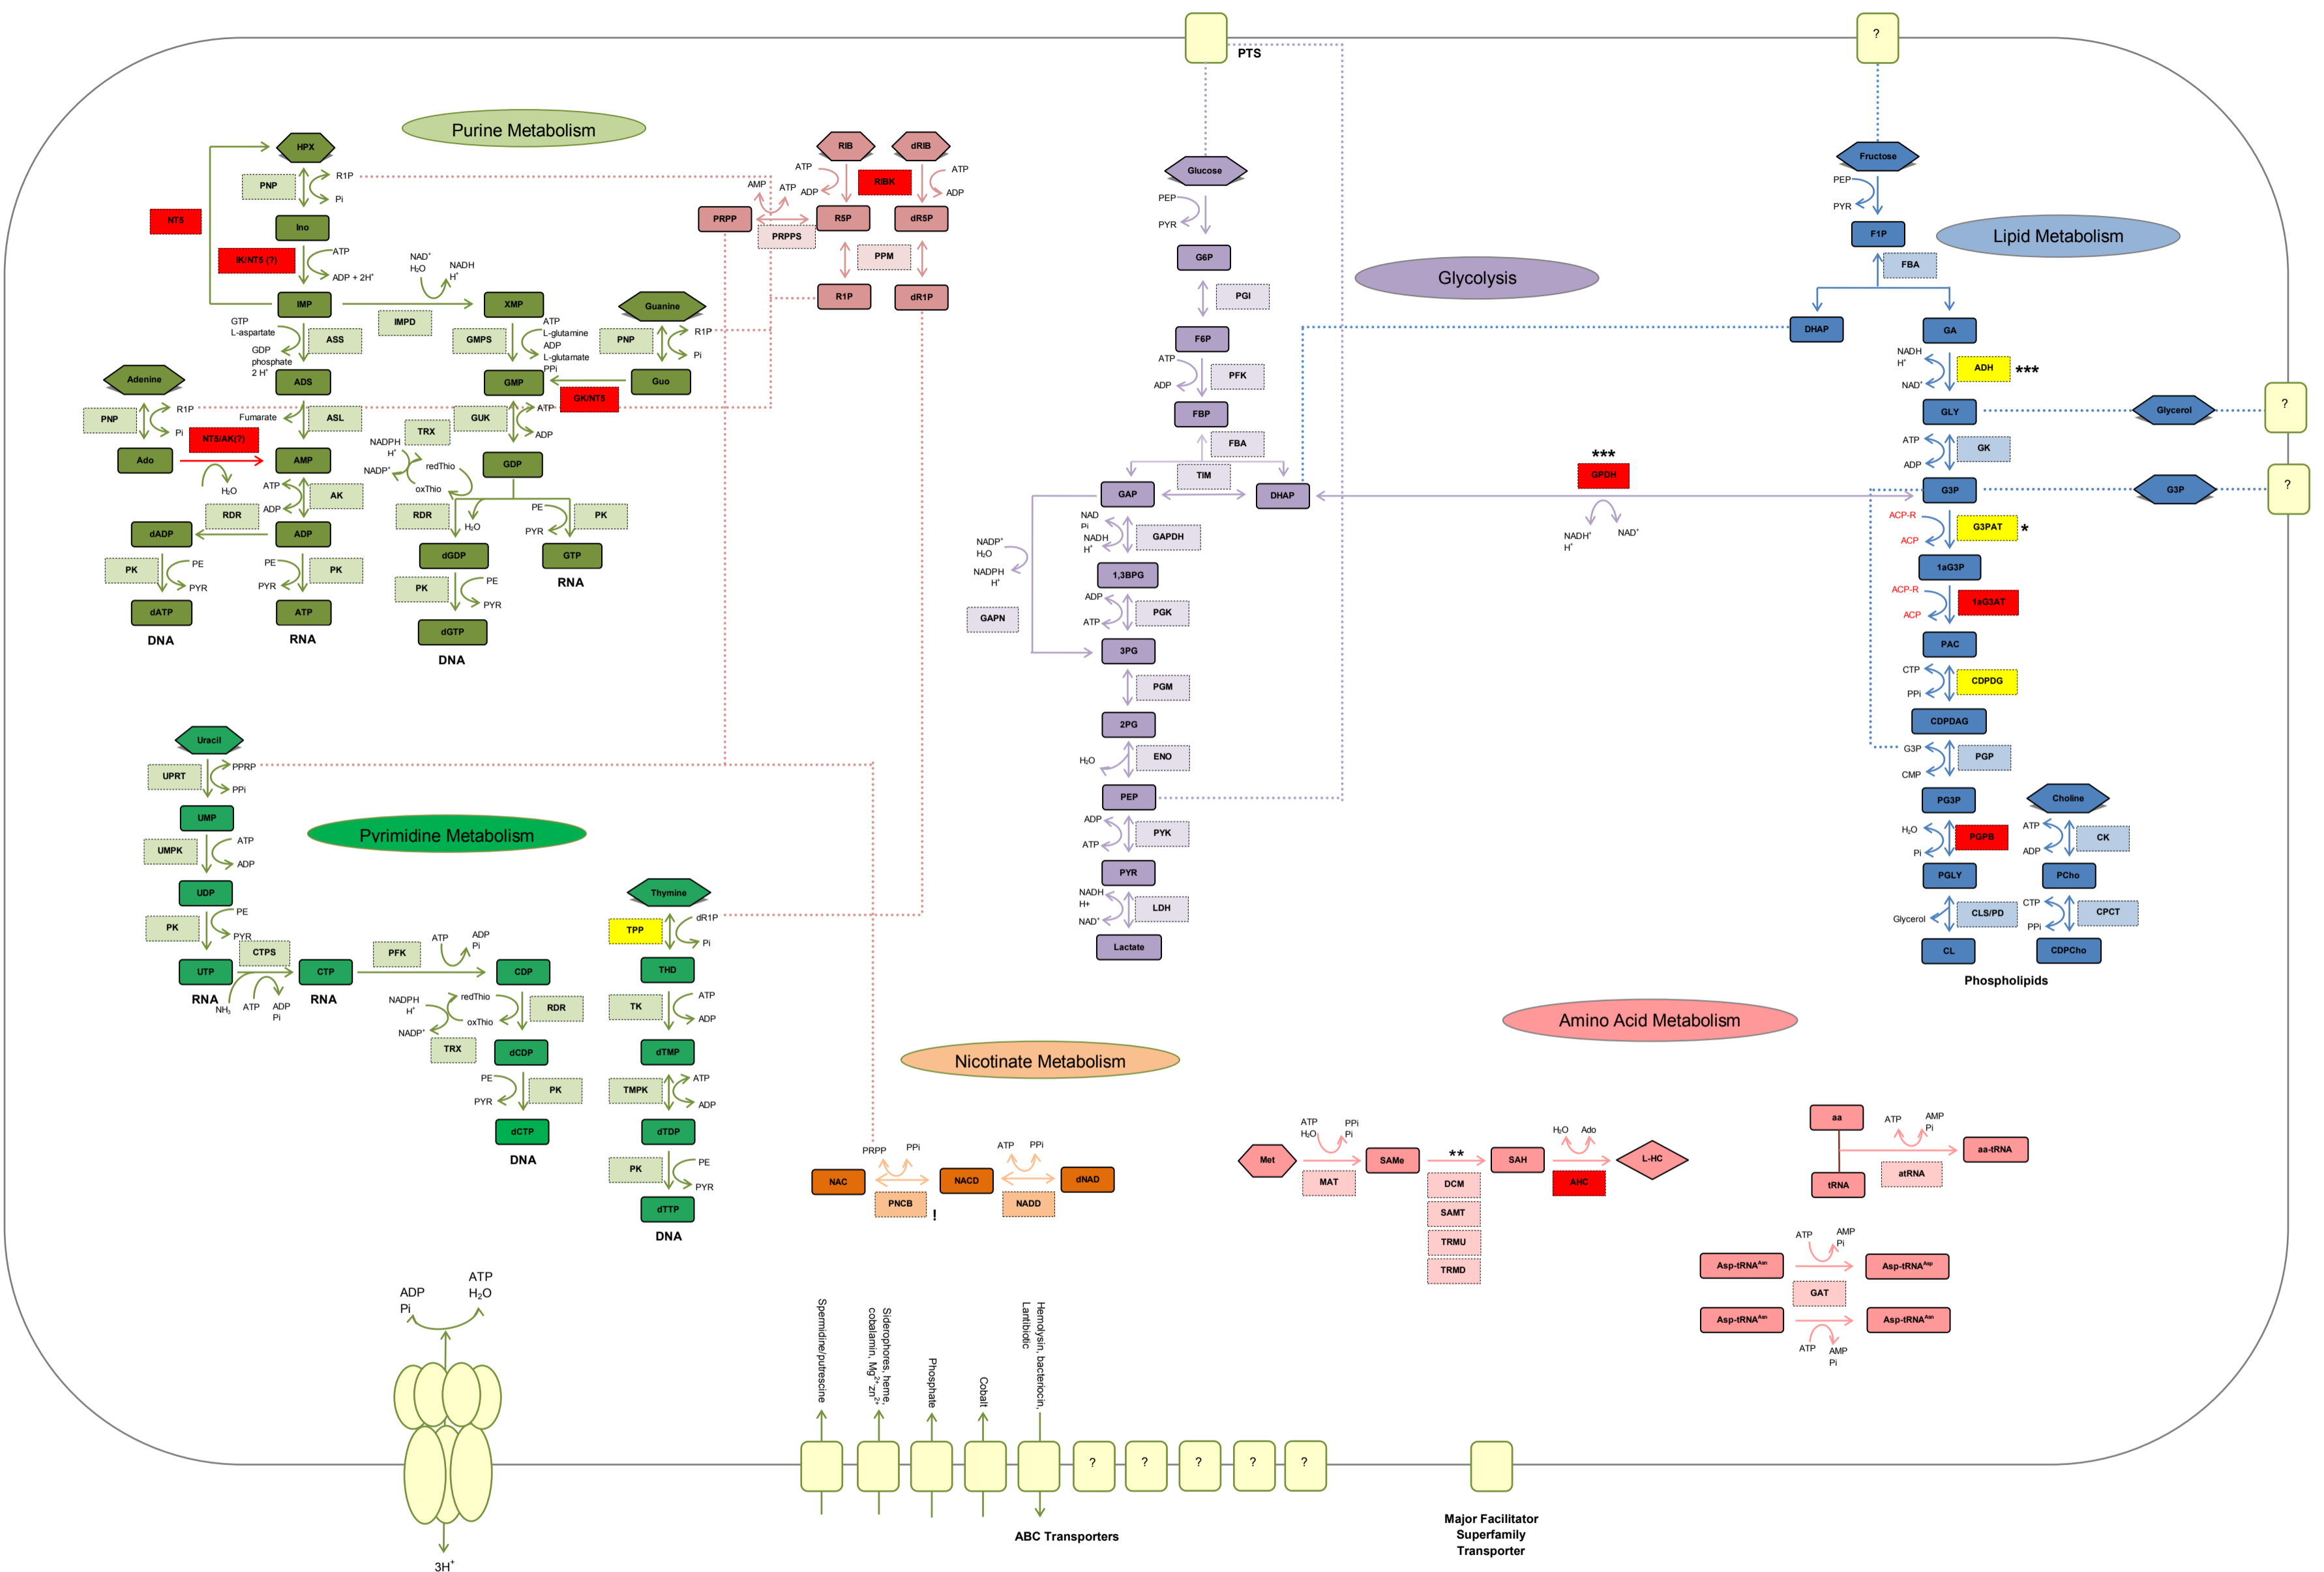

**Figure S1. Metabolic map of *Mycoplasma suis*.** Dashed boxes are enzymes. Yellow boxes represent enzymes with no orthologs in the genome but present in the proteomic study performed by Yuan et al [48]. Red boxes represent enzymes with no orthologs in the genome but likely to be present given the existence of others. Red arrows represent reactions in which the directionality is not established. Hexagons represent molecules that are uptaken by the microorganism, whereas diamonds represent exported metabolites. \* = two proteins with acyl transferase properties were found in the study performed by Yuan et al. [48]; \*\* = different products are produced depending on the enzyme; \*\*\* = MSU\_0539 has an alcohol/glycerol dehydrogenase domain (E-value 9.65 e-05) but only 65% coverage and 18% identity to known *Mollicutes* CDSs (NADH dependent butanol dehydrogenase from *M. penetrans*; E-value 4e-06). ! = presence of a frameshift mutation. MSU\_0501 has a Blast hit with relatively high E-value (0.007) to CDPDG (Phosphatidate cytidylyltransferase) from *Streptococcus* sp.; experimental studies should be conducted to evaluate enzymatic activity of this protein.
